# Supplementary material for: Cost-effectiveness modelling of birth and infant dose vaccination against hepatitis B virus in Ontario from 2020 to 2050
Source: PubMed Central journal article supplement — CMAJ Open. 2023 Jan 10;11(1):E24–32. doi: 10.9778/cmajo.20210284 (PMC9842099; doi:10.9778/cmajo.20210284), 2023-01-10
Supplement: open-2021-0284-1-at.pdf [file open-2021-0284-1-at.pdf]

1 **Title:** Cost-Effectiveness Modelling of Birth and Infant Dose Vaccination in Ontario  
2 from 2020 to 2050

3

4

5 **Mia J. Biondi, PhD, NP-PHC\*<sup>1,2</sup>, Chris Estes, MPH\*<sup>3</sup>, Devin Razavi-Shearer, BS\*<sup>3</sup>,**  
6 **Kanwar Sahdra<sup>1</sup>, Nechama Lipton<sup>1</sup>, Hemant Shah, MD, MScCH<sup>1</sup>, Camelia**  
7 **Capraru, MD<sup>1</sup>, Harry L.A. Janssen, MD, PhD<sup>1</sup>, Homie Razavi, PhD<sup>3</sup> & Jordan J.**  
8 **Feld, MD, MPH<sup>1,4Δ</sup>**

9 **\*These authors contributed equally to this work.**

10

11 <sup>1</sup> Viral Hepatitis Care Network (VIRCAN) Study Group, Toronto Centre for Liver  
12 Disease, Toronto, ON, Canada.

13 <sup>2</sup> Arthur Labatt Family School of Nursing, Western University, London, ON, Canada.

14 <sup>3</sup> Center for Disease Analysis Foundation, Lafayette, Colorado, United States.

15 <sup>4</sup> Institute of Medical Sciences, University of Toronto, Toronto, ON, Canada.

16 **ΔCorrespondence:**

17 Jordan J. Feld

18 Toronto Centre for Liver Disease, Toronto General Hospital, University Health Network  
19 200 Elizabeth Street 9EB 240, Toronto, ON M5G 2C4

20 jordan.feld@uhn.ca

21

22

23

1 **Appendix 1 - Supplementary Material**

2 **Methods**

3 **I. Literature search**

4 The literature review was conducted by searching PubMed and Embase for peer-reviewed  
5 studies reported HBsAg prevalence using the terms: “[Ontario] AND [(hepatitis B) or  
6 HBV] AND [prevalence]” AND “[Ontario] AND (‘prevalence’/exp OR prevalence)  
7 AND (‘hepatitis B’/exp OR ‘hepatitis B’ OR ‘HBV’/exp OR ‘HBV’)”. Studies published  
8 between Jan 1, 1985, and March 1, 2020 and without language restrictions were assessed.  
9 Grey literature, ministry of health reports, conference presentations, local journals, and  
10 personal communications with local experts were included in the data review. Studies  
11 conducted in non-representative populations (e.g. blood donors, hemophiliacs, and  
12 patients on hemodialysis) were excluded. Per Delphi process protocol (Table 1S), two in-  
13 person meetings were held with Ontario experts who reviewed and approved  
14 epidemiologic inputs or provided improved data sources to finalize the model.

1 **HBV prevalence estimate**

2 HBsAg prevalence in Ontario may vary by birth cohort due to changing vaccination  
3 policies and immigration over time (1). Therefore, 2016 HBsAg prevalence estimates  
4 based on recorded clinical data, adjusted based on two age distributions: reported cases  
5 by age group and population data for Ontario, with additional adjustment for the impact  
6 of immigration (2, 3). Among native-born Canadians, prevalence rates were modified to  
7 account for a declining prevalence in older Ontario residents (due to mortality rate and  
8 low infection rate). National surveillance data estimating a higher prevalence in men than  
9 women (13.2 vs. 9.6 per 100,000) (4), was applied to the distribution of cases by age  
10 group. While prevalence data do not exist for the immigrant population, estimated  
11 HBsAg prevalence based on Toronto data was considered in the baseline estimate for  
12 Ontario as a whole. For ten high prevalence countries with sizable immigrant populations  
13 (China, Hong Kong, India, Iran, Jamaica, Pakistan, Poland, Philippines, Sri Lanka,  
14 Vietnam) annual entrance data by age and sex were available from 1980-2016 (5). The  
15 Polaris Observatory has previously published country specific P<sub>Ro</sub>GReSs Models for all  
16 ten of these countries (6). Utilizing these models and the annual country-specific entrance  
17 data by age and sex the estimated annual number of HBsAg+ immigrants by age, sex, and  
18 disease stage were added to the Ontario model. For years in which no published data  
19 were currently available (2017 onwards), the number of immigrants by country of birth  
20 and distribution by age and sex were assumed to remain constant into the future. It was  
21 estimated that 70% of cases in Ontario in 2017 were among first generation migrants.

22

23

1           **II. Scenario development: Additional criteria**

2    In all scenarios, it was assumed that patients between ages 15-85, that had a high viral  
3    load or were cirrhotic, were eligible for treatment and that treatment efficacy was 90%.  
4    Prophylaxis coverage rates were varied in 3 waves (2021, 2022-2023, 2024-2050).  
5    Prevalence was also estimated for infants and 5-year-olds to assess the impact of  
6    intervention on disease outcomes in children.

7  
8  
9  
10

1 **Appendix 1 - Table 1S. Delphi Process**  
 2

| Activities                                 |    |                                                                                                                                                                                                                                                                                                                                                                                                                                                                                                                                                                                                                                                                                                                                                                                                                                                                                                                                                                                                                                                                                                                                                               |
|--------------------------------------------|----|---------------------------------------------------------------------------------------------------------------------------------------------------------------------------------------------------------------------------------------------------------------------------------------------------------------------------------------------------------------------------------------------------------------------------------------------------------------------------------------------------------------------------------------------------------------------------------------------------------------------------------------------------------------------------------------------------------------------------------------------------------------------------------------------------------------------------------------------------------------------------------------------------------------------------------------------------------------------------------------------------------------------------------------------------------------------------------------------------------------------------------------------------------------|
| Phase 1 –<br>Data Gathering                | 1a | <p><b>Identify country experts who are willing to collaborate (March 2019)</b></p> <ul style="list-style-type: none"> <li>• Experts were identified through HBV-related scientific contributions, or through referrals and recommendations from leading researchers. Panels consisted of hepatologists, gastroenterologists, virologists, infectious disease specialists, epidemiologists, health economists, health scientists and Ministry of Health representatives</li> </ul>                                                                                                                                                                                                                                                                                                                                                                                                                                                                                                                                                                                                                                                                             |
|                                            | 1b | <p><b>Literature Search (April 2019)</b></p> <ul style="list-style-type: none"> <li>• Review the internal database for previously identified sources</li> <li>• Review online sources (MOH, WHO, etc.) to capture non-indexed sources</li> <li>• Run a literature search from 2013 forward to identify recent publications</li> <li>• Summarize input data available through the literature</li> <li>• Gather empirical data for new HCC cases, liver transplants (LT), percent of HCC and LT due to HBV, annual newly diagnosed, annual treated</li> <li>• Build draft model based on published data or extrapolate inputs from countries with data when data are missing (as a placeholder)</li> <li>• Schedule meeting with experts</li> </ul>                                                                                                                                                                                                                                                                                                                                                                                                             |
| Phase 2 –<br>Country Meetings and Modeling | 2a | <p><b>Expert Meeting 1 (2-3 hours) (October 2019)</b></p> <ul style="list-style-type: none"> <li>• Provide a background on the project, model and methodology</li> <li>• Review data identified in Phase 1b and highlight gaps in data</li> <li>• Request data in local non-indexed journals, unpublished data and any other available data (e.g., hospital-level data) that can be used to fill the gaps</li> <li>• Gain agreement on countries that can be used as for extrapolation when no local data are available</li> </ul> <p><b>Follow up with Experts Post Meeting 1 (October 2019-December 2019)</b></p> <ul style="list-style-type: none"> <li>• Send minutes of the meeting and list of remaining action items to experts</li> <li>• Follow up with experts to collect missing data and get copies of publications in the local journals, unpublished data, relevant Ph.D. theses, government reports and raw hospital or registry-level data</li> <li>• Analyze raw data and send to experts for approval</li> </ul>                                                                                                                            |
|                                            | 2b | <p><b>Disease Burden Modeling (December 2019-February 2020)</b></p> <ul style="list-style-type: none"> <li>• Populate disease burden model with inputs and calibrate model to empirical data</li> <li>• Develop 2-3 scenarios to prepare for meeting 2, including a WHO target scenario (elimination by 2030)</li> <li>• Schedule second meeting</li> <li>• Develop a slide deck summarizing all inputs and associated data sources</li> <li>• Perform a final check of the model and slide deck and approve internally</li> </ul> <p><b>Expert Meeting 2 (2-3 hours) (February 2020)</b></p> <ul style="list-style-type: none"> <li>• Review all inputs as well as data provided by experts since meeting 1 and results of analyses of any raw data provided</li> <li>• Gain agreement on all inputs to be used in the model</li> <li>• Update the model using any updated inputs</li> <li>• Run scenarios requested by experts (e.g., slow increase in the number of treated patients, disease control, WHO target) and review results and insights</li> <li>• Agree on final strategies that would be considered as part of a national strategy</li> </ul> |
|                                            | 2c | <p><b>Follow-up Analyses (February 2020-June 2020)</b></p> <ul style="list-style-type: none"> <li>• Update model as necessary and send results to experts</li> <li>• Provide support to address follow-up questions</li> <li>• Lock down inputs and outputs as approved</li> <li>• Run additional scenarios to support the development of a national strategy (e.g., economic impact, birth cohort screening and sources of transmission)</li> <li>• Report results to Polaris Observatory</li> <li>• Update analysis as new information becomes available (e.g., new national studies, updated treatment data)</li> </ul>                                                                                                                                                                                                                                                                                                                                                                                                                                                                                                                                    |
|                                            | 2d |                                                                                                                                                                                                                                                                                                                                                                                                                                                                                                                                                                                                                                                                                                                                                                                                                                                                                                                                                                                                                                                                                                                                                               |
| Phase 3 –<br>Follow-up Analyses            | 3a | <p><b>Follow-up Analyses (February 2020-June 2020)</b></p> <ul style="list-style-type: none"> <li>• Update model as necessary and send results to experts</li> <li>• Provide support to address follow-up questions</li> <li>• Lock down inputs and outputs as approved</li> <li>• Run additional scenarios to support the development of a national strategy (e.g., economic impact, birth cohort screening and sources of transmission)</li> <li>• Report results to Polaris Observatory</li> <li>• Update analysis as new information becomes available (e.g., new national studies, updated treatment data)</li> </ul>                                                                                                                                                                                                                                                                                                                                                                                                                                                                                                                                    |

3  
 4  
 5  
 6

1  
2  
3

**Appendix 1 - Table 2S.** Vaccination Rate by Grade 7 – Ontario, 1994-2016.

| Year      | Value   |
|-----------|---------|
| 1994-1995 | 86.6%   |
| 1995-1996 | 88.7%   |
| 1996-1997 | 93.6%   |
| 1997-1998 | 86.5%   |
| 1998-1999 | 85.9% * |
| 1999-2000 | 85.2% * |
| 2000-2001 | 84.6% * |
| 2001-2002 | 83.9% * |
| 2002-2003 | 83.3% * |
| 2003-2004 | 82.6% * |
| 2004-2005 | 82.0% * |
| 2005-2006 | 81.3% * |
| 2006-2007 | 80.7% * |
| 2007-2008 | 80.0%   |
| 2008-2009 | 78.1%   |
| 2009-2010 | 74.2%   |
| 2010-2011 | 76.6%   |
| 2011-2012 | 86.6%   |
| 2012-2013 | 86.9%   |
| 2013-2014 | 71.7%   |
| 2014-2015 | 70.7%   |
| 2015-2016 | 69.9%   |

4 \* Not reported, data linearly interpolated  
5

1 **Appendix 1 - Figure 1S.** Flow of disease progression of HBV

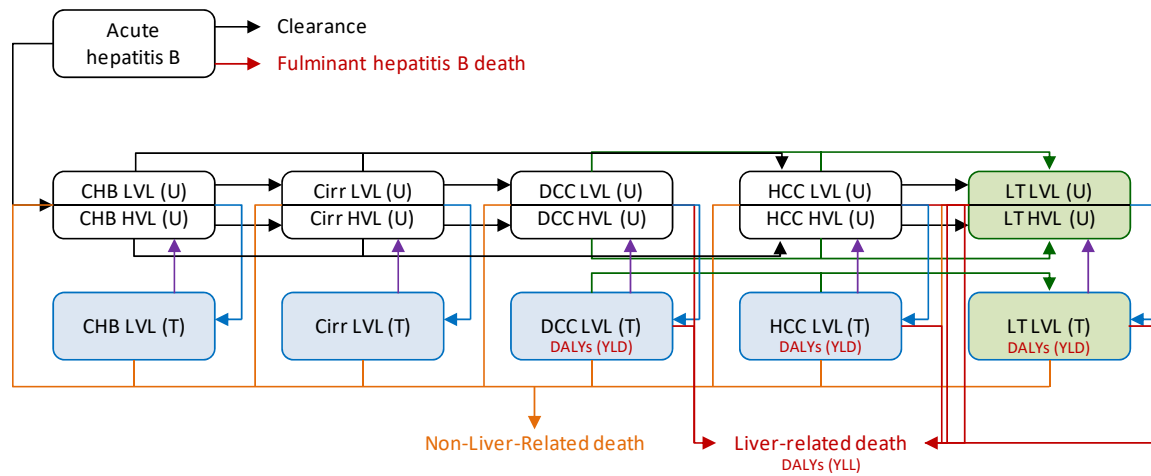

2

3 **Legend:** CHB — chronic hepatitis B; Cirr — compensated cirrhosis; DCC — decompensated cirrhosis; HCC —  
 4 hepatocellular carcinoma; LT — liver transplant; LVL — low-viral load; HVL — high-viral load; U — untreated/non-  
 5 responder; T — treatment responder; DALYs (YLD) — disability-adjusted life years (years lived with disability);  
 6 DALYs (YLL) — disability-adjusted life years (years of life lost); black arrows — disease progression; orange arrows  
 7 — non-liver-related death; red arrows — liver-related death; blue arrows — treatment response; purple arrows —  
 8 treatment discontinuation; green arrows — liver transplantation

9  
10  
11  
12  
13  
14  
15  
16  
17  
18  
19  
20  
21  
22  
23  
24  
25  
26  
27  
28  
29

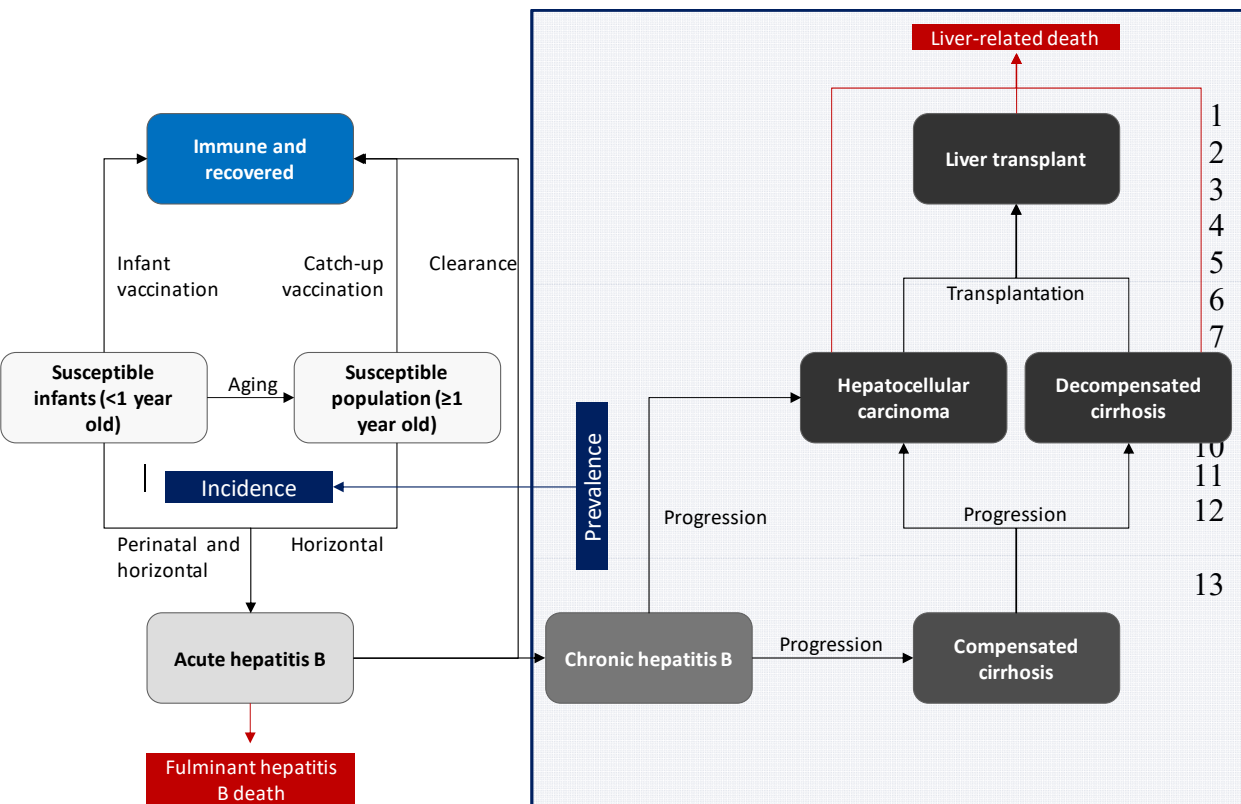

**Appendix 1 - Figure 2S.** Flow between populations in the model



## 1   **References**

- 2   1.     Ontario Agency for Health Protection and Promotion (Public Health Ontario).  
3   Hepatitis B Immunization. Toronto, ON; 2017.
- 4   2.     Biondi MJ, Marchand-Austin A, Cronin K, Nanwa N, Ravirajan V, Mandel E, et  
5   al. Prenatal hepatitis B screening, and hepatitis B burden among children, in Ontario: a  
6   descriptive study. *Cmaj*. 2020;192(43):E1299-e305.
- 7   3.     Statistics Canada. Census Profile, 2016 Census. 2019.
- 8   4.     Report on Hepatitis B and C in Canada: 2017. Ottawa, ON: Centre for  
9   Communicable Diseases and Infection Control, Infectious Disease Prevention and  
10  Control Branch, Public Health Agency of Canada July 2019.
- 11  5.     Statistics Canada. 2016 Census of Population. Ottawa: Statistics Canada; 2017.  
12  Contract No.: Catalogue no. 98-400-X2016185.
- 13  6.     Razavi-Shearer D, Gamkrelidze I, Nguyen MH, Chen DS, Van Damme P, Abbas  
14  Z, et al. Global prevalence, treatment, and prevention of hepatitis B virus infection in  
15  2016: a modelling study. *Lancet Gastroenterol Hepatol*. 2018;3(6):383-403.
- 16
