# Supplementary material for: Cost-effectiveness modelling of birth and infant dose vaccination against hepatitis B virus in Ontario from 2020 to 2050
Source: PubMed Central journal article supplement — CMAJ Open. 2023 Jan 10;11(1):E24–32. doi: 10.9778/cmajo.20210284 (PMC9842099; doi:10.9778/cmajo.20210284), 2023-01-10
Supplement: open-2021-0284-original-submission.pdf [file open-2021-0284-original-submission.pdf]

1 **Title:** Economic Impact of Alternative Hepatitis B Vaccination Strategies – Ontario,  
2 2020-2050

3  
4  
5 **Mia J. Biondi, PhD, NP-PHC\*<sup>1,2</sup>, Chris Estes, MPH\*<sup>3</sup>, Devin Razavi-Shearer, BS\*<sup>3</sup>,**  
6 **Kanwar Sahdra<sup>1</sup>, Nechama Lipton<sup>1</sup>, Hemant Shah, MD, MScCH<sup>1</sup>, Camelia**  
7 **Capraru, MD<sup>1</sup>, Harry L.A. Janssen, MD, PhD<sup>1</sup>, Homie Razavi, PhD<sup>3</sup> & Jordan J.**  
8 **Feld, MD, MPH<sup>1,4Δ</sup>**

9 **\*These authors contributed equally to this work.**

10  
11 <sup>1</sup> Viral Hepatitis Care Network (VIRCAN) Study Group, Toronto Centre for Liver  
12 Disease, Toronto, ON, Canada.

13 <sup>2</sup> Arthur Labatt Family School of Nursing, Western University, London, ON, Canada.

14 <sup>3</sup> Center for Disease Analysis Foundation, Lafayette, Colorado, United States.

15 <sup>4</sup> Institute of Medical Sciences, University of Toronto, Toronto, ON, Canada.

16 **ΔCorrespondence:**

17 Jordan J. Feld

18 Toronto Centre for Liver Disease, Toronto General Hospital, University Health Network  
19 200 Elizabeth Street 9EB 240, Toronto, ON M5G 2C4

20 jordan.feld@uhn.ca

21 **Contributions**

22 Mia Biondi, Chris Estes, Devin Razavi-Shearer, Homie Razavi, and Jordan Feld  
23 conceived and designed the study. Mia Biondi, Chris Estes, Devin Razavi-Shearer,

1 Kanwar Sahdra, Nechama Lipton, and Jordan Feld retrieved the data. Chris Estes and  
2 Devin Razavi-Shearer ran the model; supervision by Mia Biondi, Jordan Feld, and Homie  
3 Razavi. All authors reviewed the manuscript and approved the final version to be  
4 published and agreed to be accountable for all aspects of the work.

### 5 **Funding**

6 This study was supported by the Viral Hepatitis Care Network.

### 7 **Competing Interests**

8 HLAJ reports serving as a speaker, consultant or advisory board member for AbbVie,  
9 Arbutus, Benitec, Bristol Myers Squibb, Gilead Sciences, Glaxo, Janssen, Medimmune,  
10 Merck, Roche and Vir Biotechnology, and receiving research funding from AbbVie,  
11 Bristol Myers Squibb, Gilead Sciences, Janssen, Medimmune, Merck and Roche. JJF  
12 reports receiving research support and/or consulting fees from AbbVie, Enanta, Eiger,  
13 Gilead, Janssen, Roche, Arbutus and GlaxoSmithKline. No other competing interests  
14 were declared.

### 15 **Abbreviations**

16 HBV, hepatitis B virus; HCC, hepatocellular carcinoma; HBIG, hepatitis B  
17 immunoglobulin; HBsAg, hepatitis B surface antigen; WoCBA, women of childbearing  
18 age; HBeAg, hepatitis B e antigen; DALY, disability-adjusted life year; CAD, Canadian  
19 dollar; UI, uncertainty intervals; ROI, return on investment

20 **Keywords:** hepatitis B virus; vaccination; transmission prevention; pediatrics; cost-  
21 benefit analysis

1  
2  
3 **Abstract**  
4  
5  
6  
7

8 **Background:** The World Health Organization recommends universal birth dose  
9  
10 vaccination for hepatitis B virus (HBV), yet Ontario continues to vaccinate in  
11  
12 adolescence. We recently demonstrated that Canadian-born children in Ontario are  
13  
14 acquiring HBV prior to adolescent vaccination. Although there may be clinical benefit to  
15  
16 infant immunization, we sought to determine whether this approach was cost-effective.  
17  
18

19 **Methods:** A model was constructed to quantify the future disease and economic burden  
20  
21 of chronic HBV infection in Ontario from 2020-2050. Four infant vaccination approaches  
22  
23 were compared to adolescent vaccination for effectiveness and direct and indirect costs  
24  
25 were calculated.  
26  
27

28 **Results:** All four infant approaches prevented an additional 550-560 acute and 160  
29  
30 chronic pediatric HBV infections from 2020-2050 in comparison to adolescent  
31  
32 vaccination. While birth dose could be cost-effective, incorporating vaccination into a  
33  
34 hexavalent vaccine was cost-saving. By 2050 the hexavalent approach led to \$428,000  
35  
36 cost-saving per disability-adjusted life years (DALY) averted in comparison to birth dose  
37  
38 which led to \$103,000 cost-incurred per DALY averted.  
39  
40  
41

42 **Interpretation:** Introducing any form of infant HBV immunization in Ontario will  
43  
44 prevent acute and chronic pediatric HBV infections. At the current prevalence in Ontario,  
45  
46 a switch to birth dose or infant dose will be cost-effective or cost-saving respectively.  
47  
48  
49

50  
51  
52  
53  
54  
55  
56  
57  
58  
59  
60

## 1 Introduction

2 In Ontario, hepatitis B virus (HBV) ranks 4<sup>th</sup> on the list of infectious diseases with the  
3 greatest burden of illness by years of life lost (1). Health consequences from longstanding  
4 infection include cirrhosis and liver failure, or hepatocellular carcinoma. Infants who  
5 acquire HBV through vertical or early horizontal exposure have a >90% risk of  
6 progression to chronic infection, whereas 99% of immunocompetent adults will clear  
7 acute HBV upon infection (2). As a result, the World Health Organization has prioritized  
8 HBV birth dose vaccination as a key tenet of the strategy for HBV elimination. Globally,  
9 birth dose vaccination has decreased prevalence from 5% to 1% in children under 5 years  
10 old (2). However, almost 30 years after the initiation of birth dose vaccination and  
11 adoption among 100+ countries (3), only 3 provinces/territories in Canada provide birth  
12 dose vaccination, 5 vaccinate in infancy, and 5 in adolescence; including Ontario (4).

13  
14 We recently demonstrated that children born in Canada, living in Ontario, are acquiring  
15 HBV before age 12 (6 cases per 1000); infections likely prevented with universal birth  
16 dose vaccination. This number only reflects infections among children who were tested,  
17 therefore likely a significant underestimate of Ontario-acquired pediatric infections (5).

18 Children may have been infected through vertical transmission when prenatal screening  
19 was missed or horizontal transmission from contacts who may not have been aware of  
20 their infection. HBV prevalence is particularly high among newcomers to Canada from  
21 HBV-endemic regions (6-8). Although children should be vaccinated at birth if a  
22 household contact or caregiver is known to carry HBV, a high proportion of those living

1 with HBV have not been diagnosed as the infection is largely asymptomatic and is not  
2 part of the routine Canadian immigration medical examination (9, 10).

3  
4 To consider the cost and public health implications of a policy change in Ontario and the  
5 other four provinces that immunize in adolescence, we utilized the PRoGReSs model  
6 (11), a dynamic HBV model that incorporates population by year, disease stage, sex, and  
7 the influence of immigration. We compared vaccination timing based on direct and health  
8 outcomes to determine which approaches would be cost-effective or cost-saving  
9 compared to current adolescent vaccination over the period 2020 to 2050.

## 10 **Methods**

11  
12 Data for model inputs were based on literature review, administrative data, institutional  
13 internal data, and expert consensus. Ontario population (12), mortality and historical data  
14 inputs were entered in the Ontario HBV disease burden and transmission model  
15 (PRoGReSs Model) including HBsAg prevalence by age and sex, HBeAg prevalence and  
16 rate of high viral load among women of childbearing potential (WoCBP), hepatitis B  
17 immune globulin (HBIG) and birth dose for infants born to positive mothers, the annual  
18 number of HBV-related liver transplants, and treatment and diagnosis rates  
19 (Supplementary Methods) (13).

## 20 **Scenario development and assessment**

21  
22 HBV disease burden and economic impacts were assessed under five scenarios. A base  
23 scenario and four general population vaccination strategies were modeled from 2020-  
24 2050 under the following conditions (Table 1): 1) current two-dose adolescent

1 vaccination (base case); 2) birth dose vaccination, and individual vaccinations at 1 and 6  
2 months; 3) birth dose vaccination, vaccination at 1 month, and a hexavalent 6 month  
3 vaccination (DTaP-HB-IPV-Hib); 4) birth dose vaccination, with hexavalent doses at 2  
4 and 6 months; and 5) hexavalent vaccination at 2, 4, 6 months. Scenario details and a  
5 description of the calculation of uncertainty are described in Supplementary Methods IV  
6 and V.

### 8 **Economic impact analysis**

9 Cost data were applied to disease burden outcomes to determine the economic impact of  
10 each scenario. Direct costs included healthcare, screening, prophylaxis, diagnostic, and  
11 treatment costs. Healthcare costs by disease stage were reported previously (14), but were  
12 adjusted to remove the reported cost of medications for cases classified as chronic HBV  
13 (F0-F3) and compensated cirrhosis, as the treated population was tracked separately.  
14 Costs for HBV medication were reported previously (15), and adjusted based on the  
15 distribution of patients by treatment regimen at the Toronto Centre for Liver Disease  
16 from 2010-2019. Indirect costs were based on the value of a statistical life year (GDP per  
17 capita = 62,138 (16); Table 2) and disability-adjusted life years [DALYs] (17) incurred  
18 due to years of life lost due to premature mortality and years lived with disability (Table  
19 2). All costs were inflated to 2020 Canadian dollars (CAD) based on the consumer price  
20 index for health care (18). Economic outcomes were analyzed to 2050 to account for lag  
21 time between the implementation of infant prophylaxis on disease burden effects and  
22 economic changes.

## 1 **Results**

### 2 **Characteristics of the HBV-infected population**

3 Assuming a male to female ratio of 1.38 (5, 7, 19), the impact of immigration, and  
4 adjusted for reported HBsAg and HBeAg prevalence among pregnant women (5)  
5 including the proportion with high viral load ( $\geq 20,000$  IU/mL) (20), the HBsAg  
6 prevalence in Ontario was estimated at 0.80% in 2017 (Table 2). In that year, there were  
7 an estimated 39,623 previously diagnosed cases and 1,878 newly diagnosed cases (21)  
8 (19). In 2016, the antiviral treated population was estimated at 11,600 patients, and there  
9 were an estimated 25 HBV-related liver transplants performed in Ontario (Table 2).

### 10 **HBV immunization and post-exposure prophylaxis**

11 Modeling included the impact of diagnostics, treatment, and immunization on disease and  
12 economic burden. Ontario introduced universal adolescent vaccination in 1997 (22), and  
13 immunization coverage data for Ontario were either directly available from Public Health  
14 Ontario or were linearly extrapolated (Supplementary Table 1S). For infants born to  
15 HBsAg+ mothers, 93.7% (5) received birth dose coverage within the first 24 hours of  
16 life, three dose coverage, and HBIG coverage based on current comprehensive  
17 immunization programs (23). 38% of eligible women received third trimester antiviral  
18 treatment (5).

### 19 **Disease Burden**

20 With the current adolescent vaccination strategy, acute HBV infections were projected to  
21 decrease from 110 in 2020 to 16 in 2050 (85% decline); largely due to an overall  
22 decrease in unvaccinated adults as a result of 70%+ immunization rates in school-based  
23 programs since 1997. Despite this, 1500 acute and 520 chronic infections (Table 3) would

1 still occur over the 30-year time-frame due to infections in the pediatric population under  
2 12, new infections in those who either did not receive or were not eligible for adolescent  
3 vaccination and imported cases as a result of immigration. In comparison, all infant  
4 scenarios prevented 560-570 acute and 160 and chronic cases by 2050 (Table 3). As a  
5 result of those already infected in 2020 and imported cases as well as new adult chronic  
6 infections, liver-related deaths increased until 2042 when they peaked at 780 deaths,  
7 declining thereafter (Table 3).

### 8 **Direct Costs**

9 Direct costs included healthcare, screening, prophylaxis, diagnostic, and treatment costs.  
10 Both annual costs and cumulative costs (2020-2050) were compared between scenarios.  
11 For all proposed scenarios, annual direct medical costs were estimated at \$142 M (2020  
12 CAD) in 2020 and were projected to decrease approximately 50%, partially as the result  
13 of an annual 3% discount rate, but largely due to a decrease in prevalence with any  
14 vaccination strategy. Direct medical costs for adolescent vaccination over 30 years was  
15 \$3,333M (Figure 1A, Table 3). These costs decreased related to the type of alternative  
16 vaccination strategy and in a stepwise fashion depending on whether the HBV vaccine  
17 was given as a separate dose, or a part of the hexavalent vaccine. For example, if  
18 following the recommended birth dose schedule and delivering all three as separate  
19 vaccines, direct costs increased to \$3,424M, while as a part of the hexavalent strategy  
20 direct costs were less than adolescent immunization at \$3,310M (Table 3). Annual cost  
21 savings peaked in 2022, with savings ranging from \$1.3M-\$4.4M.

### 22 **Immunization Costs**



1 Annual immunization costs were estimated at \$2.4M in 2020 under all scenarios and  
2 declined by 65% for adolescent vaccination to \$0.91M in 2050, due to the application of  
3 a standard 3% discount rate. Costs were incurred during the 12-year catch-up period for  
4 all infant vaccination scenarios (Figure 1B). Annual costs for the two strategies which  
5 include birth dose and 1-month dosing had greater costs every year from 2020-2050,  
6 leading to cumulative immunizations costs increasing by up to 160% (from \$46M to  
7 \$119M). However, the two strategies that had at least two of three doses as a part of the  
8 hexavalent immunization had costs below the current adolescent costs by 2030 (**Error!**  
9 **Reference source not found.**B). The hexavalent strategy also decreased cumulative costs  
10 by 50%, from \$46M to \$23M. Cumulative immunization costs represented 1.4% of direct  
11 medical costs for adolescent vaccination and between 0.70% (3 hexavalent  
12 immunizations) and 3.5% (3 individual doses including birth dose) of costs under the  
13 infant vaccination scenarios.

#### 14 **Indirect and Total Costs**

15 Indirect costs were based on the value of a statistical life year (\$62,138) applied to  
16 DALYs incurred by each scenario. Indirect costs accounted for 75% of total (direct and  
17 indirect) costs in 2020 (\$600M), peaking at 85% of annual total costs in 2045 under all  
18 scenarios. Total indirect and direct costs were \$18.43B for adolescent vaccination,  
19 increased to \$18.52B for 3 individual doses, and were \$18.41B when using the three-dose  
20 hexavalent approach (Figure 2A). As compared to adolescent vaccination, total  
21 cumulative costs were \$62M higher with three individual doses, while three-dose  
22 hexavalent led to cost savings of \$23M by 2050 (Figure 2B).

#### 23 **Disability-Adjusted Life Years (DALYs) and Cost-Effectiveness**

1  
2  
3 1 Approximately 3% of all DALYs were incurred as a result of years lived with disability,  
4  
5 2 and 97% were incurred due to years of life lost (liver-related death). In 2020, there were  
6  
7 3 an estimated 9,650 annual DALYs incurred due to HBV, increasing to 11,100 annual  
8  
9 4 DALYs by 2050 with the current adolescent strategy, an increase of 15%. This increase is  
10  
11 5 largely the result of the impacts of the liver-related disability and death for the current  
12  
13 6 chronically infected population, as well as chronic infections among newcomers to  
14  
15 7 Canada between 2020 and 2050. Total cumulative DALYs using adolescent vaccination  
16  
17 8 were estimated at 360,000 during 2020-2050, and by 2050, all four infant scenarios had  
18  
19 9 averted the same number of DALYs ( $\geq 54$  DALYs) (Table 3). As the model did not use a  
20  
21 10 lifetime horizon, the major contributor to DALYs averted is immunization costs from  
22  
23 11 2020-2050. Cost per DALY incurred ranged from \$104,000 to \$1.68M (birth dose plus  
24  
25 12 separate individual vaccines at 1 and 6 months), while hexavalent dosing at 2, 4, and 6  
26  
27 13 months was cost-saving at \$428,000 per DALY averted (Figure 3B, Table 3). Sensitivity  
28  
29 14 analysis was conducted for the cost per DALY averted in the hexavalent approach as  
30  
31 15 compared to adolescent vaccination (Supplementary Methods V). HBsAg prevalence, the  
32  
33 16 cost of HBV treatment and the prevalence of HBeAg+ among HBsAg+ WoCBA were the  
34  
35 17 key drivers of uncertainty, accounting for 95% of variation (Figure 4). Prevalence alone  
36  
37 18 accounted for >80% of observed uncertainty (Supplementary Material Section III).  
38  
39  
40  
41  
42  
43  
44  
45  
46

## 47 20 **Discussion**

48  
49 21 We recently demonstrated that there is epidemiologic evidence to reconsider the current  
50  
51 22 adolescent HBV vaccination strategy in Ontario (5). Here, we demonstrate that  
52  
53 23 incorporating infant immunization into our current vaccination schedule would prevent  
54  
55  
56  
57  
58  
59  
60

1 acute and chronic infections. Incorporating immunization into a hexavalent vaccine given  
2 at 2, 4, 6 months would also be cost-saving by 2050.

3  
4 We evaluated 5 scenarios for HBV vaccination strategies. The impact of immigration,  
5 especially as it relates to immigration to Canada from high prevalence countries of HBV,  
6 was included. While infant vaccination does not eliminate the impact of imported cases, it  
7 would prevent early childhood transmission from caregivers who may have acquired  
8 HBV prior. All vaccination strategies led to an overall decline in chronic cases by 2050.  
9 However, switching to any form of birth or infant vaccination, would prevent 37-38% of  
10 acute and 30-31% of chronic cases in Ontario by 2050. All models include continuation  
11 of HBV screening of pregnant women (~94%), and universal birth dose and HBIG for  
12 children born to known HBsAg-positive mothers.

13  
14 To switch from two-dose adolescent to three-dose infant vaccination, there would be a  
15 12-year period where vaccination was occurring both groups to ensure all children were  
16 vaccinated. A single birth dose strategy was cost-effective, as the cost per DALY was  
17 less than the standard willingness-to-pay threshold of two times GDP per capita  
18 (\$124,000) (24). In this approach the hexavalent vaccine at 2 and 6 months would replace  
19 our current pentavalent strategy which does not include HBV, costing less per year than  
20 the adolescent strategy after the 12-year catch-up period after 2032. However, as shown  
21 in Figure 1B, switching now to a hexavalent approach at 2, 4, and 6 months would not  
22 lead to additional immunization costs, and thus no additional costs during the catch-up  
23 period.

1  
2  
3  
4 1  
5 2 Visits for pediatric immunizations are typically incorporated into well-baby visits in  
6 3 primary care/pediatrics, or at local health units, whereas school-based adolescent  
7 4 vaccination require additional infrastructure. Nonetheless, adolescent immunization  
8 5 coverage is suboptimal and much lower than infant. Both national and provincial reports  
9 6 published in 2020 demonstrate an uptake of other 3-dose infant programs of 90% (25),  
10 7 while HBV adolescent coverage in Ontario in recent years has been as low as 67% (Table  
11 8 1S). Not only would incorporating HBV vaccination into well-baby visits reduce the  
12 9 number of injections children would receive, and be cost-saving, but this approach would  
13 10 follow the provincial strategy for primary care providers to administer the majority of  
14 11 immunizations in Ontario (26).

12  
13 13 There is existing evidence that birth dose or infant immunization reduces both acute and  
14 14 chronic HBV in children; yet adoption varies greatly by province. British Columbia has  
15 15 been immunizing children in infancy for 20 years (27), and early analysis of the impact of  
16 16 infant vaccination showed benefit (28). Nunavut, a region known to have a high  
17 17 prevalence, has also been providing birth dose and infant vaccination for over 20 years.  
18 18 The first serosurvey results in the post-vaccination era were recently described,  
19 19 documenting a reduction in hepatitis B core antibody (a marker of exposure) prevalence  
20 20 from 19.8% to 1.8%, and a decrease in HBsAg prevalence from 2.5% to 0.3% (29).

## 21 **Limitations**

22 22 Estimates of HBV prevalence for foreign-born Ontario residents were assumed to be  
23 23 similar to the prevalence in country of origin (30), however this assumption may not be

1 accurate in some populations(31). The model likely underestimates the cost of disease  
2 burden, as it does not account for HIV/HBV, HBV/HCV and HBV/HDV co-infections;  
3 all of which can lead to faster disease progression. Although hepatocellular carcinoma  
4 can still develop following HBsAg clearance (32, 33), the current model does not account  
5 for the small amount of older chronically infected individuals who clear HBsAg (34-37).  
6 As a result of the short timeframe, HBV-related deaths and end-of-life care is not  
7 accounted for. Although not evaluated in this model, additional cost-savings are very  
8 likely, including eliminating the logistics, supplies and personnel for the school-based  
9 HBV vaccination program; the likely higher cost of adult vs pediatric vaccine doses; and  
10 the buying power of Ontario, potentially benefitting other provinces which use the  
11 hexavalent vaccine in Canada.

## 12 **Conclusion**

13 Transitioning from adolescent HBV vaccination to infant immunization would be cost-  
14 effective and could be cost-saving. These cost-savings and decreases in case numbers  
15 would almost certainly apply to other provinces where adolescent vaccination continues  
16 to be the standard of care, and therefore it may be reasonable to suggest a national shift to  
17 infant HBV vaccination.

## 19 **Acknowledgements**

20 We thank our clinical and scientific collaborators for supplying expert opinion and  
21 previously acquired data to assist with the inputs for the model.

## 1        1        **References**

- 2        1.        Kwong JC, Ratnasingham S, Campitelli MA, Daneman N, Deeks SL, Manuel DG,  
3        et al. The impact of infection on population health: results of the Ontario burden of  
4        infectious diseases study. *PLoS One*. 2012;7(9):e44103.
- 5        2.        World Health Organization. Hepatitis B2020 February 5, 2020. Available from:  
6        <https://www.who.int/news-room/fact-sheets/detail/hepatitis-b>.
- 7        3.        World Health Organization. Immunization coverage2020 December 31, 2020.  
8        Available from: [https://www.who.int/news-room/fact-sheets/detail/immunization-](https://www.who.int/news-room/fact-sheets/detail/immunization-coverage)  
9        [coverage](https://www.who.int/news-room/fact-sheets/detail/immunization-coverage).
- 10       4.        Government of Canada. Canada's provincial and territorial routine (and catch-up)  
11       vaccination programs for infants and children2017 November 11, 2019. Available from:  
12       [https://www.canada.ca/en/public-health/services/provincial-territorial-immunization-](https://www.canada.ca/en/public-health/services/provincial-territorial-immunization-information/provincial-territorial-routine-vaccination-programs-infants-children.html)  
13       [information/provincial-territorial-routine-vaccination-programs-infants-children.html](https://www.canada.ca/en/public-health/services/provincial-territorial-immunization-information/provincial-territorial-routine-vaccination-programs-infants-children.html).
- 14       5.        Biondi MJ, Marchand-Austin A, Cronin K, Nanwa N, Ravirajan V, Mandel E, et  
15       al. Prenatal hepatitis B screening, and hepatitis B burden among children, in Ontario: a  
16       descriptive study. *CMAJ*. 2020;192(43):E1299-E305.
- 17       6.        Coffin CS, Ramji A, Cooper CL, Miles D, Doucette KE, Wong P, et al.  
18       Epidemiologic and clinical features of chronic hepatitis B virus infection in 8 Canadian  
19       provinces: a descriptive study by the Canadian HBV Network. *CMAJ Open*.  
20       2019;7(4):E610-E7.
- 21       7.        Statistics Canada. Census Profile, 2016 Census. 2019.
- 22       8.        Wong WW, Woo G, Heathcote EJ, Krahn M. Disease burden of chronic hepatitis  
23       B among immigrants in Canada. *Can J Gastroenterol*. 2013;27(3):137-47.
- 24       9.        Lapointe-Shaw L, Chung H, Holder L, Kwong JC, Sander B, Austin PC, et al.  
25       Diagnosis of Chronic Hepatitis B Peri-Complication: Risk factors and Trends over Time.  
26       *Hepatology*. 2020.
- 27       10.       Health Management Branch GoC. Handbook for Designated Medical Practitioners  
28       2009. Available from: [http://publications.gc.ca/collections/collection\\_2011/cic/Ci4-11-](http://publications.gc.ca/collections/collection_2011/cic/Ci4-11-2011-eng.pdf)  
29       [2011-eng.pdf](http://publications.gc.ca/collections/collection_2011/cic/Ci4-11-2011-eng.pdf).
- 30       11.       de Villiers MJ, Gamkrelidze I, Hallett TB, Nayagam S, Razavi H, Razavi-Shearer  
31       D. Modelling hepatitis B virus infection and impact of timely birth dose vaccine: A  
32       comparison of two simulation models. *PloS one*. 2020;15(8):e0237525.
- 33       12.       Statistics Canada. Table 17-10-0005-01 Population estimates on July 1st, by age  
34       and sex 2020 [updated 2020-04-02. Available from:  
35       <https://www150.statcan.gc.ca/t1/tbl1/en/tv.action?pid=1710000501>.
- 36       13.       Razavi-Shearer D, Gamkrelidze I, Nguyen MH, Chen DS, Van Damme P, Abbas  
37       Z, et al. Global prevalence, treatment, and prevention of hepatitis B virus infection in  
38       2016: a modelling study. *Lancet Gastroenterol Hepatol*. 2018;3(6):383-403.
- 39       14.       Gagnon YM, Levy AR, Iloeje UH, Briggs AH. Treatment costs in Canada of  
40       health conditions resulting from chronic hepatitis B infection. *J Clin Gastroenterol*.  
41       2004;38(10 Suppl 3):S179-86.
- 42       15.       He J, Bowen JM, Xie F, Goeree R. Cost-effectiveness analysis of antiviral  
43       treatments for HBsAg-positive chronic hepatitis B in Canada. *Value in health : the*  
44       *journal of the International Society for Pharmacoeconomics and Outcomes Research*.  
45       2012;15(6):894-906.

16. World Bank. World Bank Country Data - Canada 2020 [Available from: <http://api.worldbank.org/v2/en/country/CAN?downloadformat=csv>.]
17. World Health Organization. WHO methods and data sources for global burden of disease estimates 2000-2019. Geneva; 2020. Contract No.: Global Health Estimates Technical Paper WHO/ DDI/DNA/GHE/2020.3.
18. Statistics Canada. Table 18-10-0004-01 Consumer Price Index, monthly, not seasonally adjusted 2020 [updated 04/02/2020. Available from: <https://www150.statcan.gc.ca/t1/tb11/en/tv.action?pid=1810000401>.]
19. Public Health Agency of Canada. Report on Hepatitis B and C in Canada: 2017. Ottawa, ON: Centre for Communicable Diseases and Infection Control, Infectious Disease Prevention and Control Branch, Public Health Agency of Canada; 2019.
20. Wiseman E, Fraser MA, Holden S, Glass A, Kidson BL, Heron LG, et al. Perinatal transmission of hepatitis B virus: an Australian experience. *Med J Aust*. 2009;190(9):489-92.
21. Nanwa N, Kwong J, Feld J, Wu F, Sander B. A population-based matched cohort study evaluating the health care costs of hepatitis B virus (HBV) in Ontario, Canada. *Canadian Liver Journal* 2019;2(2):65.
22. Public Health Ontario. Hepatitis B immunization. 2017.
23. Ontario Agency for Health Protection and Promotion (Public Health Ontario). Hepatitis B Immunization. Toronto, ON; 2017.
24. The World Health Organization. Making Choices in Health: WHO Guide to Cost-Effectiveness Analysis 2003 April 5, 2021. Available from: <https://apps.who.int/iris/bitstream/handle/10665/42699/9241546018.pdf;jsessionid=4A70C65C925E0E4B6CADCDCA1F58E7D2?sequence=1>.
25. Public Health Agency of Canada. Vaccine Coverage in Canadian Children: Results from the 2017 Childhood National Immunization Coverage Survey (cNICS) 2020 December 23, 2020. Available from: <https://www.canada.ca/content/dam/phac-aspc/documents/services/publications/healthy-living/2017-vaccine-uptake-canadian-children-survey/2017-vaccine-uptake-canadian-children-survey-eng.pdf>.
26. Ministry of Health and Long-Term Care. About Immunization 2020: Modernizing Ontario's Publicly Funded Immunization Program 2020 December 23, 2020. Available from: [http://www.health.gov.on.ca/en/common/ministry/publications/reports/immunization\\_2020/immunization\\_2020\\_report.pdf](http://www.health.gov.on.ca/en/common/ministry/publications/reports/immunization_2020/immunization_2020_report.pdf).
27. BC Centre for Disease Control. History of Immunization in BC 2020 December 23, 2020. Available from: <http://www.bccdc.ca/resource-gallery/Documents/Guidelines%20and%20Forms/Guidelines%20and%20Manuals/Epid/CD%20Manual/Chapter%20-%20-%20Imms/HistoryImmunization.pdf>.
28. Mackie CO, Buxton JA, Tadwalkar S, Patrick DM. Hepatitis B immunization strategies: timing is everything. *CMAJ*. 2009;180(2):196-202.
29. Huynh C, Minuk GY, Uhanova J, Baikie M, Wong T, Osiowy C. Serological and molecular epidemiological outcomes after two decades of universal infant hepatitis B virus (HBV) vaccination in Nunavut, Canada. *Vaccine*. 2017;35(35 Pt B):4515-22.
30. Sharma S, Carballo M, Feld JJ, Janssen HL. Immigration and viral hepatitis. *J Hepatol*. 2015;63(2):515-22.

- 1  
2  
3  
4 1 31. Ahmad AA, Falla AM, Duffell E, Noori T, Bechini A, Reintjes R, et al.  
5 2 Estimating the scale of chronic hepatitis B virus infection among migrants in EU/EEA  
6 3 countries. *BMC infectious diseases*. 2018;18(1):34.  
7 4 32. Adachi H, Kaneko S, Matsushita E, Inagaki Y, Unoura M, Kobayashi K.  
8 5 Clearance of HBsAg in seven patients with chronic hepatitis B. *Hepatology*.  
9 6 1992;16(6):1334-7.  
10 7 33. Ahn SH, Park YN, Park JY, Chang HY, Lee JM, Shin JE, et al. Long-term clinical  
11 8 and histological outcomes in patients with spontaneous hepatitis B surface antigen  
12 9 seroclearance. *J Hepatol*. 2005;42(2):188-94.  
13 10 34. Chen CJ, Yang HI. Natural history of chronic hepatitis B REVEALed. *J*  
14 11 *Gastroenterol Hepatol*. 2011;26(4):628-38.  
15 12 35. Chu CM, Liaw YF. HBsAg seroclearance in asymptomatic carriers of high  
16 13 endemic areas: appreciably high rates during a long-term follow-up. *Hepatology*.  
17 14 2007;45(5):1187-92.  
18 15 36. Gigi E, Lalla T, Orphanou E, Sinakos E, Vrettou E, Raptopoulou-Gigi M. Long  
19 16 term follow-up of a large cohort of inactive HBsAg (+)/ HBeAg (-)/ anti-HBe (+) carriers  
20 17 in Greece. *J Gastrointestin Liver Dis*. 2007;16(1):19-22.  
21 18 37. Zacharakis GH, Koskinas J, Kotsiou S, Papoutselis M, Tzara F, Vafeiadis N, et al.  
22 19 Natural history of chronic HBV infection: a cohort study with up to 12 years follow-up in  
23 20 North Greece (part of the Interreg I-II/EC-project). *J Med Virol*. 2005;77(2):173-9.  
24 21 38. Statistics Canada. Table 17-10-0009-01 Population estimates, quarterly. 2020.  
25 22 39. World Health Organization. The Global Burden of Disease Concept. Geneva,  
26 23 Switzerland; 2015.  
27 24 40. Saab S, Hunt DR, Stone MA, McClune A, Tong MJ. Timing of hepatitis C  
28 25 antiviral therapy in patients with advanced liver disease: a decision analysis model. *Liver*  
29 26 *Transpl*. 2010;16(6):748-59.  
30 27 41. Chen SCC, Toy M, Yeh JM, Wang JD, Resch S. Cost-effectiveness of  
31 28 augmenting universal hepatitis B vaccination with immunoglobulin treatment. *Pediatrics*.  
32 29 2013;131(4):e1135-e43.  
33 30 42. World Population Prospects 2019, Online Edition [Internet]. United Nations,  
34 31 Department of Economic and Social Affairs, Population Division. 2019 [cited 2019-09-  
35 32 20]. Available from: <https://population.un.org/wpp/>.  
36 33 43. Statistics Canada. 2016 Census of Population. Ottawa: Statistics Canada; 2017.  
37 34 Contract No.: Catalogue no. 98-400-X2016185.  
38 35  
39 36  
40 37  
41 38  
42  
43  
44  
45  
46  
47  
48  
49  
50  
51  
52  
53  
54  
55  
56  
57  
58  
59  
60



1 **Title:** Economic Impact of Alternative Hepatitis B Vaccination Strategies – Ontario,  
2 2020-2050

3  
4  
5 **Mia J. Biondi, PhD, NP-PHC<sup>\*1,2</sup>, Chris Estes, MPH<sup>\*3</sup>, Devin Razavi-Shearer, BS<sup>\*3</sup>,**  
6 **Kanwar Sahdra<sup>1</sup>, Nechama Lipton<sup>1</sup>, Hemant Shah, MD, MScCH<sup>1</sup>, Camelia**  
7 **Capraru, MD<sup>1</sup>, Harry L.A. Janssen, MD, PhD<sup>1</sup>, Homie Razavi, PhD<sup>3</sup> & Jordan J.**  
8 **Feld, MD, MPH<sup>1,4Δ</sup>**

9 **\*These authors contributed equally to this work.**

10  
11 <sup>1</sup> Viral Hepatitis Care Network (VIRCAN) Study Group, Toronto Centre for Liver  
12 Disease, Toronto, ON, Canada.

13 <sup>2</sup> Arthur Labatt Family School of Nursing, Western University, London, ON, Canada.

14 <sup>3</sup> Center for Disease Analysis Foundation, Lafayette, Colorado, United States.

15 <sup>4</sup> Institute of Medical Sciences, University of Toronto, Toronto, ON, Canada.

16 **ΔCorrespondence:**

17 Jordan J. Feld

18 Toronto Centre for Liver Disease, Toronto General Hospital, University Health Network

19 200 Elizabeth Street 9EB 240, Toronto, ON M5G 2C4

20 jordan.feld@uhn.ca

21

22

23

## 1 **Supplementary Material**

### 2 **Methods**

#### 3 **I. Literature search**

4 The literature review was conducted by searching PubMed and Embase for peer-reviewed  
5 studies reported HBsAg prevalence using the terms: “[Ontario] AND [(hepatitis B) or  
6 HBV] AND [prevalence]” AND “[Ontario] AND (‘prevalence’/exp OR prevalence)  
7 AND (‘hepatitis B’/exp OR ‘hepatitis B’ OR ‘HBV’/exp OR ‘HBV’)”. Studies published  
8 between Jan 1, 1985, and March 1, 2016 and without language restrictions were assessed.  
9 Grey literature, ministry of health reports, conference presentations, local journals, and  
10 personal communications with local experts were included in the data review. Studies  
11 conducted in non-representative populations (e.g. blood donors, hemophiliacs, and  
12 patients on hemodialysis) were excluded. Per Delphi process protocol, two in-person  
13 meetings were held with Ontario experts who reviewed and approved epidemiologic  
14 inputs or provided improved data sources to finalize the model.

#### 15 **II. The HBV PRoGRess Model**

16 The HBV Progress Model is a dynamic Markov disease burden and transmission model  
17 that tracks the distribution of HBsAg prevalence by sex, age (1-year age cohorts), year  
18 (1950-2050), disease stage (acute, chronic, cirrhosis, decompensated cirrhosis, HCC, and  
19 death), and viral load (categorical), while accounting for background mortality, disease  
20 progression rates, spontaneous viral clearance, and fulminant hepatitis. Disease  
21 transmission was calculated both horizontally and vertically (by vertical transmission  
22 rates). Data from Statistics Canada (12) and the United Nation’s Department of Economic  
23 and Social Affairs, Population Division (42) were used for annual background population

1 and mortality estimates by sex and 1-year age cohort from 1950-2050. Epidemiologic  
2 estimates for HBV (Table 2), were applied to the background Ontario population.

### 3 **III. HBV prevalence estimate**

4 HBsAg prevalence in Ontario may vary by birth cohort due to changing vaccination  
5 policies and immigration over time (23). Therefore, 2016 HBsAg prevalence estimates  
6 based on recorded clinical data, adjusted based on two age distributions: reported cases  
7 by age group and population data for Ontario, with additional adjustment for the impact  
8 of immigration (5, 7). Among native-born Canadians, prevalence rates were modified to  
9 account for a declining prevalence in older Ontario residents (due to mortality rate and  
10 low infection rate). National surveillance data estimating a higher prevalence in men than  
11 women (13.2 vs. 9.6 per 100,000) (19), was applied to the distribution of cases by age  
12 group. While prevalence data do not exist for the immigrant population, estimated  
13 HBsAg prevalence based on Toronto data was considered in the baseline estimate for  
14 Ontario as a whole. For ten high prevalence countries with sizable immigrant populations  
15 (China, Hong Kong, India, Iran, Jamaica, Pakistan, Poland, Philippines, Sri Lanka,  
16 Vietnam) annual entrance data by age and sex were available from 1980-2016 (43). The  
17 Polaris Observatory has previously published country specific PRoGReSs Models for all  
18 ten of these countries (13). Utilizing these models and the annual country-specific  
19 entrance data by age and sex the estimated annual number of HBsAg+ immigrants by  
20 age, sex, and disease stage were added to the Ontario model. For years in which no  
21 published data were currently available (2017 onwards), the number of immigrants by  
22 country of birth and distribution by age and sex were assumed to remain constant into the

1 future. It was estimated that 70% of cases in Ontario in 2017 were among first generation  
2 migrants.

#### 3 **IV. Scenario development: Additional criteria**

4 In all scenarios, it was assumed that patients between ages 15-85, that had a high viral  
5 load or were cirrhotic, were eligible for treatment and that treatment efficacy was 90%.  
6 Prophylaxis coverage rates were varied in 3 waves (2021, 2022-2023, 2024-2050).  
7 Prevalence was also estimated for infants and 5-year-olds to assess the impact of  
8 intervention on disease outcomes in children.

#### 9 **V. Sensitivity analysis**

10 Sensitivity analysis was calculated for high-level disease burden and economic impact  
11 outcomes using Crystal Ball release 11.1.2.3.500.  $\beta$ -PERT distributions were used for all  
12 uncertainty intervals. We used a Monte Carlo simulation to estimate key drivers of  
13 uncertainty for the cost per DALY averted for Scenario 5 as compared to the Base  
14 Scenario, with input ranges based on published estimates and expert input (Table 1) (13).  
15 The key drivers of uncertainty (Figure 4) account for >99% of the variation around cost  
16 per DALY averted when comparing the hexavalent approach to the adolescent  
17 vaccination.

1 **Figure 1S.** HBsAg prevalence and case count for the adolescent vaccination, Ontario,  
2 2020-2050.  
3

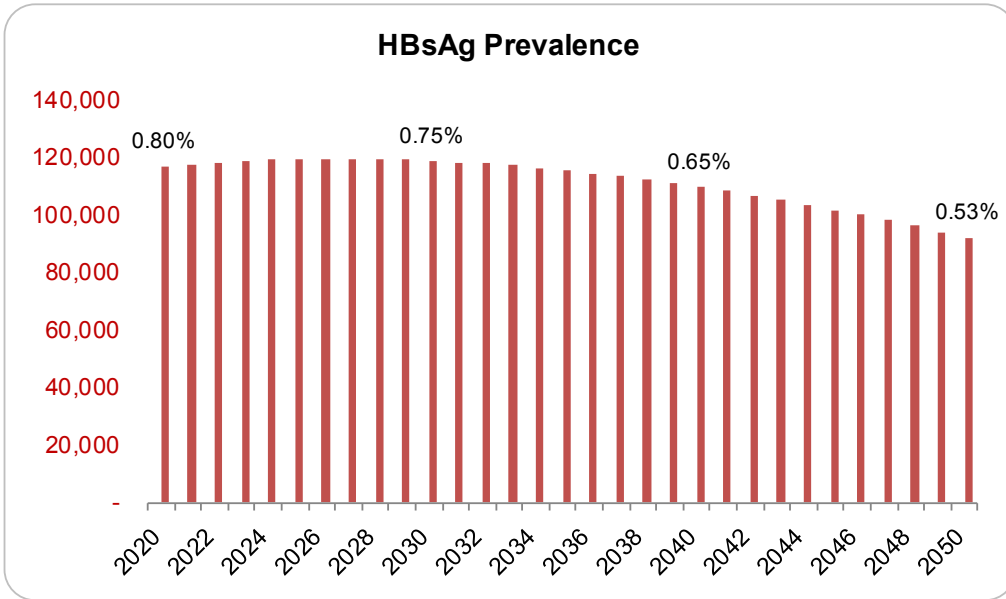

Confidential

1  
2  
3  
4  
5  
6  
7  
8  
9  
10  
11  
12  
13  
14  
15  
16  
17  
18  
19  
20  
21  
22  
23  
24  
25  
26  
27  
28  
29  
30  
31  
32  
33  
34  
35  
36  
37  
38  
39  
40  
41  
42  
43  
44  
45  
46  
47  
48  
49  
50  
51  
52  
53  
54  
55  
56  
57  
58  
59  
60

1 **Figure 2S.** HBsAg prevalence by sex and age group for the adolescent vaccination, 2020  
2 and 2035.  
3

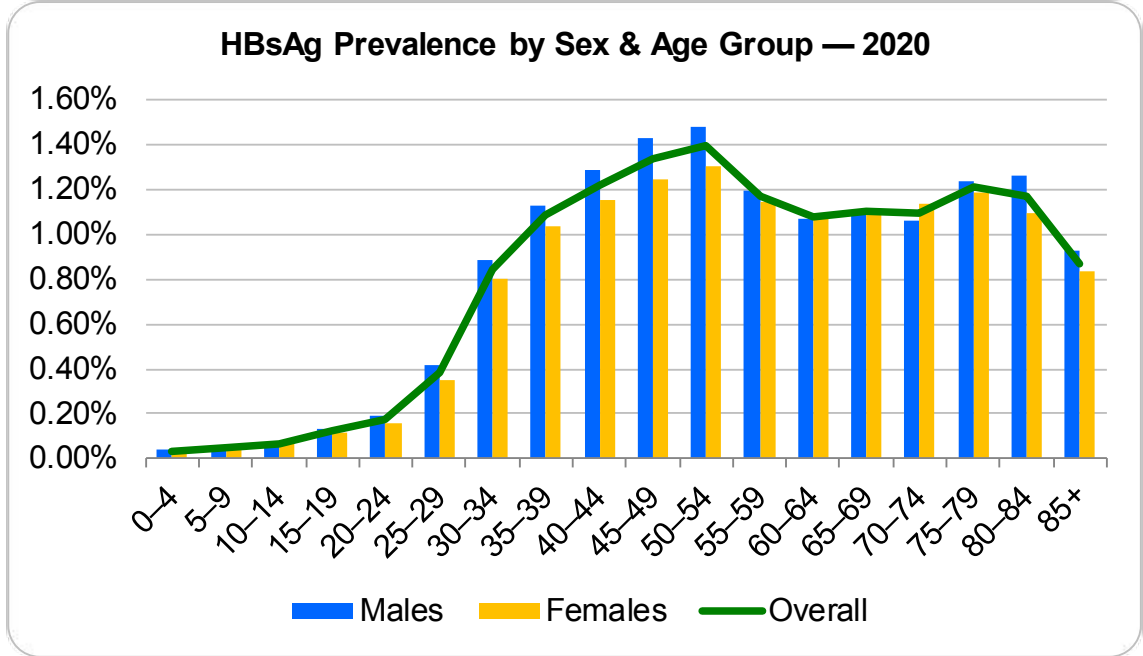

Confidential

1 **Table 1S.** Vaccination Rate in Grade – Ontario, 1994-2016.  
 2  
 3  
 4

| Year      | Value   |
|-----------|---------|
| 1994-1995 | 86.6%   |
| 1995-1996 | 88.7%   |
| 1996-1997 | 93.6%   |
| 1997-1998 | 86.5%   |
| 1998-1999 | 85.9% * |
| 1999-2000 | 85.2% * |
| 2000-2001 | 84.6% * |
| 2001-2002 | 83.9% * |
| 2002-2003 | 83.3% * |
| 2003-2004 | 82.6% * |
| 2004-2005 | 82.0% * |
| 2005-2006 | 81.3% * |
| 2006-2007 | 80.7% * |
| 2007-2008 | 80.0%   |
| 2008-2009 | 78.1%   |
| 2009-2010 | 74.2%   |
| 2010-2011 | 76.6%   |
| 2011-2012 | 86.6%   |
| 2012-2013 | 86.9%   |
| 2013-2014 | 71.7%   |
| 2014-2015 | 70.7%   |
| 2015-2016 | 69.9%   |

2 \* Not reported, data linearly interpolated  
 3  
 4  
 5  
 6  
 7  
 8  
 9  
 10  
 11  
 12  
 13  
 14  
 15  
 16  
 17  
 18  
 19  
 20  
 21  
 22  
 23  
 24  
 25  
 26  
 27  
 28  
 29  
 30  
 31  
 32  
 33  
 34  
 35  
 36  
 37  
 38  
 39  
 40  
 41  
 42  
 43  
 44  
 45  
 46  
 47  
 48  
 49  
 50  
 51  
 52  
 53  
 54  
 55  
 56  
 57  
 58  
 59  
 60

1  
2  
3 **TABLES**  
4  
5  
6  
7

8 **Table 1. General Population Intervention Scenarios – Ontario**  
9

10

11

12

13

14

15

16

17

18

19

20

21

22

23

24

25

26

27

28

29

30

31

32

33

34

35

36

37

38

39

40

41

42

43

44

45

46

47

48

49

50

51

52

53

54

55

56

57

58

59

60

| Scenario                                         | Administration                                                                                 | Predicted Immunization Coverage |           |           |      |           |           |
|--------------------------------------------------|------------------------------------------------------------------------------------------------|---------------------------------|-----------|-----------|------|-----------|-----------|
|                                                  |                                                                                                | 2021                            | 2022-2023 | 2024-2050 | 2021 | 2022-2023 | 2024-2050 |
| 1 Base Scenario<br>(current adolescent schedule) | Two pediatric HBV doses in Grade 7                                                             | 0%                              | 0%        | 0%        | 0%   | 0%        | 0%        |
| 2 3 individual doses<br>(0, 1, 6 months)         | Three pediatric HBV doses in the first year of life                                            | 75%                             | 90%       | 95%       | 75%  | 90%       | 95%       |
| 3 2 individual, 1 combined<br>(0, 1, 6 months)   | Two pediatric HBV doses, final dose hexavalent on the same schedule as current pentavalent     | 75%                             | 90%       | 95%       | 75%  | 90%       | 95%       |
| 4 1 individual, 2 combined<br>(0, 2, 6 months)   | One dose of pediatric HBV, two doses of hexavalent on the same schedule as current pentavalent | 75%                             | 90%       | 95%       | 75%  | 90%       | 95%       |
| 5 3 combined<br>(2, 4, 6 months)                 | Three doses of hexavalent on the same schedule as current pentavalent                          | 0%                              | 0%        | 0%        | 75%  | 90%       | 95%       |



**Table 2. Model Parameters**

| Disease Burden Inputs                                                                         |           |                           | Low   | High  |
|-----------------------------------------------------------------------------------------------|-----------|---------------------------|-------|-------|
| Item                                                                                          | Year      | Value (Source)            |       |       |
| HBsAg+ prevalence                                                                             | 2017      | 0.80% (determined)        | 0.29% | 1.6%  |
| HBsAg+ prevalence:<br>Male to female ratio                                                    | 2017      | 1.38 (1)                  | —     | —     |
| HBeAg+ among HBsAg+ WoCBA                                                                     | 2012-2016 | 18.9% (2)                 | 9.1%  | 24.0% |
| Viral load $\geq 20,000$ UI/mL among HBeAg+                                                   | 2002-2008 | 90% (3)                   | —     | —     |
| Viral load $\geq 20,000$ UI/mL among HBeAg-                                                   | 2002-2008 | 13% (3)                   | —     | —     |
| Total diagnosed                                                                               | 2003-2013 | 39,623 <sup>†</sup>       | —     | —     |
| Newly diagnosed                                                                               | 2017      | 1,878 (1)                 | —     | —     |
| Total treated                                                                                 | 2018      | 6,520 (1, 4) <sup>‡</sup> | —     | —     |
| Annual liver transplants                                                                      | 2016      | 264 *                     | —     | —     |
| Liver transplants due to HBV                                                                  | 2016      | 9.3% *                    | —     | —     |
| HBV vaccination timely birth and three dose coverage rates for infants born to HBsAg+ mothers | 2016      | 93.7% (5) <sup>†</sup>    | —     | —     |
| HBIG coverage rate for infants born to HBsAg+ mothers that also receive timely birth dose     | 2016      | 93.7% <sup>†</sup>        | —     | —     |

| Economic Inputs                                |                                             |                        | Low   | High  |
|------------------------------------------------|---------------------------------------------|------------------------|-------|-------|
| Category                                       | Item                                        | 2020 Value (Source)    |       |       |
| Disability Weight                              | Disability weight – decompensated cirrhosis | 0.178 (6)              | —     | —     |
|                                                | Disability weight – HCC                     | 0.466 (6)              | —     | —     |
|                                                | Disability weight – liver transplant        | 0.024 (6)              | —     | —     |
| Value of a statistical life year (2020 CAD)    | GDP per capita                              | 62,138 (7)             | —     | —     |
| Screening and lab costs per test (2020 CAD)    | HBsAg                                       | 10.25 <sup>§</sup>     |       |       |
|                                                | HBeAg                                       | 10.25 <sup>§</sup>     |       |       |
|                                                | Viral load testing                          | 100.00 <sup>†</sup>    |       |       |
|                                                | ALT testing                                 | 10.00 <sup>§</sup>     |       |       |
|                                                | CBC / Creatinine / Bilirubin                | 29.00 <sup>§</sup>     |       |       |
|                                                | Abdominal Ultrasound                        | 135.9 (8) <sup>¶</sup> | 68.39 | 271.8 |
| HBV Treatment and prophylaxes costs (2020 CAD) | Treatment (annual)                          | 5,770 (9)              | 3,509 | 8,031 |
|                                                | HBV Vaccination – children                  | 11.16 <sup>†</sup>     | 10.92 | 11.40 |
|                                                | Vaccination – adult                         | 7.44 <sup>†</sup>      | 7.28  | 7.60  |
|                                                | HBIG                                        | 287 (10)               | 230   | 344   |

|                                      |                          |              |         |         |
|--------------------------------------|--------------------------|--------------|---------|---------|
| Annual health state costs (2020 CAD) | Chronic HBV              | 1,150 (11)   | 1,048   | 1,341   |
|                                      | Compensated cirrhosis    | 2,517 (11)   | 2,013   | 3,760   |
|                                      | Decompensated cirrhosis  | 15,113 (11)  | 11,184  | 22,059  |
|                                      | Hepatocellular carcinoma | 17,970 (11)  | 14,279  | 23,134  |
|                                      | Liver transplant         | 133,346 (11) | 126,969 | 143,801 |
|                                      | Post-liver transplant    | 51,475 (11)  | 45,015  | 62,035  |

ALT, alanine transaminase; HBeAg, hepatitis B e-antigen; HBIG, hepatitis B immune globulin; HBsAg, hepatitis B surface antigen; CAD, Canadian dollar

\* Unpublished data: Internal analysis conducted at London Health Sciences Centre & Toronto General Hospital

† Expert consensus

‡ Treatment rate for British Columbia applied to Ontario with adjustment for population and prevalence rate ratio

§ Provincial reimbursement

¶ Adjusted: 67% of infected population receives abdominal ultrasound based on age guidelines ( $\geq 40$  years for men and  $\geq 50$  years for women)

**Table 3. General Population Intervention Scenarios – Ontario**

|   |                                                 | Cumulative Burden 2020-2050 |             |                             |               |                       |
|---|-------------------------------------------------|-----------------------------|-------------|-----------------------------|---------------|-----------------------|
|   | Scenario                                        | Acute HBV                   | Chronic HBV | Cumulative Direct Costs (M) | DALYs Averted | Cost per DALY Averted |
| 1 | Base Scenario<br>(current adolescent schedule)  | 1,500                       | 520         | 3,333                       | –             | –                     |
| 2 | 3 individual doses<br>(0, 1, 6 months)          | 940                         | 360         | 3,424                       | 54            | 1,675,000             |
| 3 | 2 individual, 1<br>combined<br>(0, 1, 6 months) | 940                         | 360         | 3,370                       | 54            | 671,000               |
| 4 | 1 individual, 2<br>combined<br>(0, 2, 6 months) | 940                         | 360         | 3,339                       | 54            | 103,000               |

FIGURES

Figure 1A

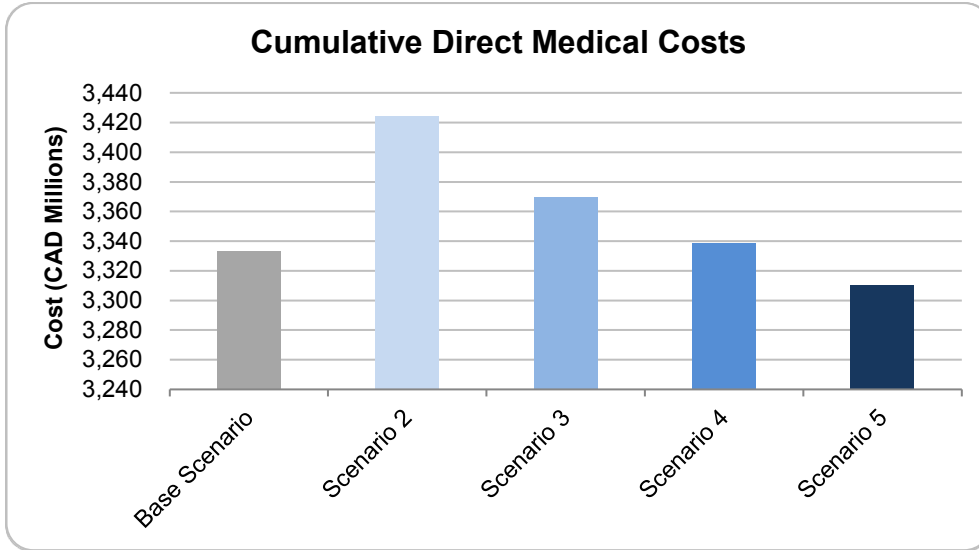

Figure 1B

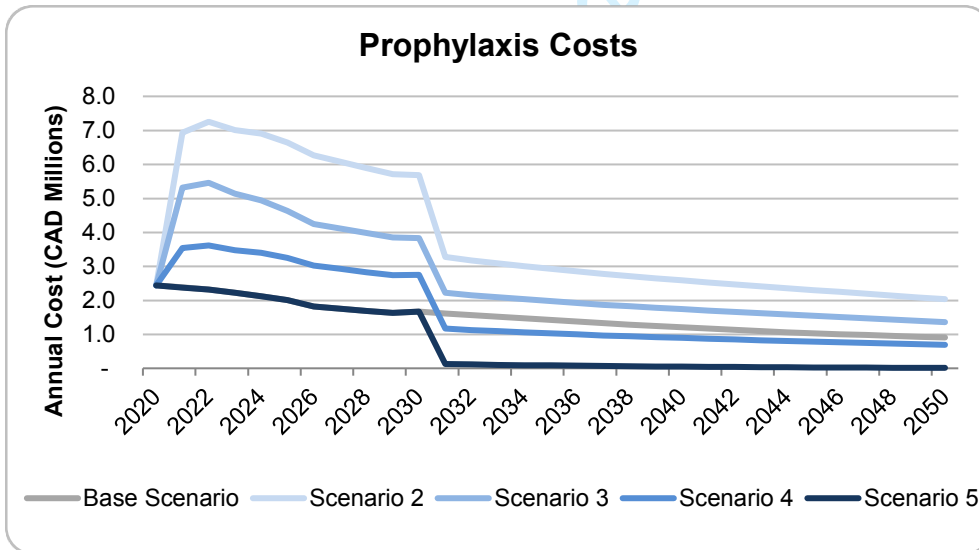

Figure 1. HBV-related direct A) medical costs of HBV management and B) immunization costs by scenario 2020-2050, Ontario.

1  
2  
3  
4  
5  
6  
7  
8  
9  
10  
11  
12  
13  
14  
15  
16  
17  
18  
19  
20  
21  
22  
23  
24  
25  
26  
27  
28  
29  
30  
31  
32  
33  
34  
35  
36  
37  
38  
39  
40  
41  
42  
43  
44  
45  
46  
47  
48  
49  
50  
51  
52  
53  
54  
55  
56  
57  
58  
59  
60

Figure 2A

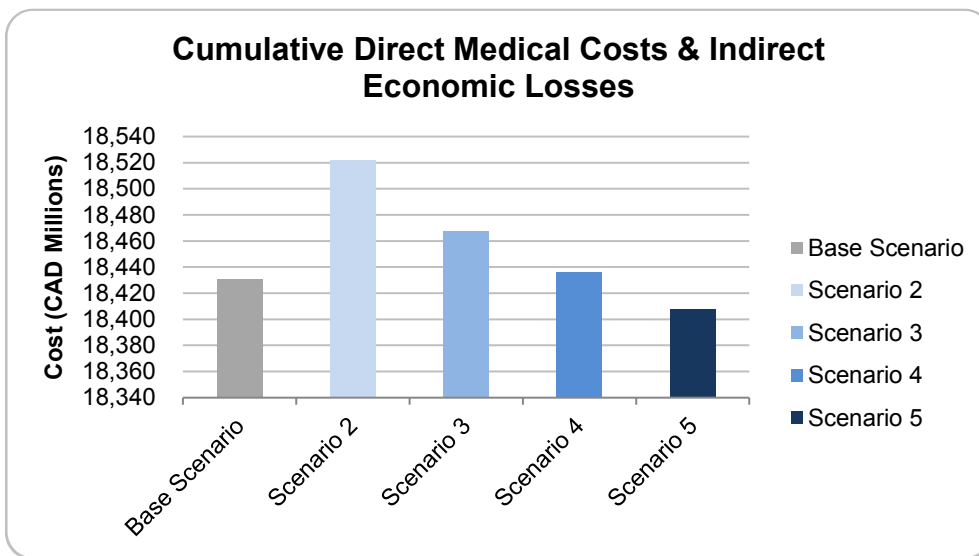

Figure 2B

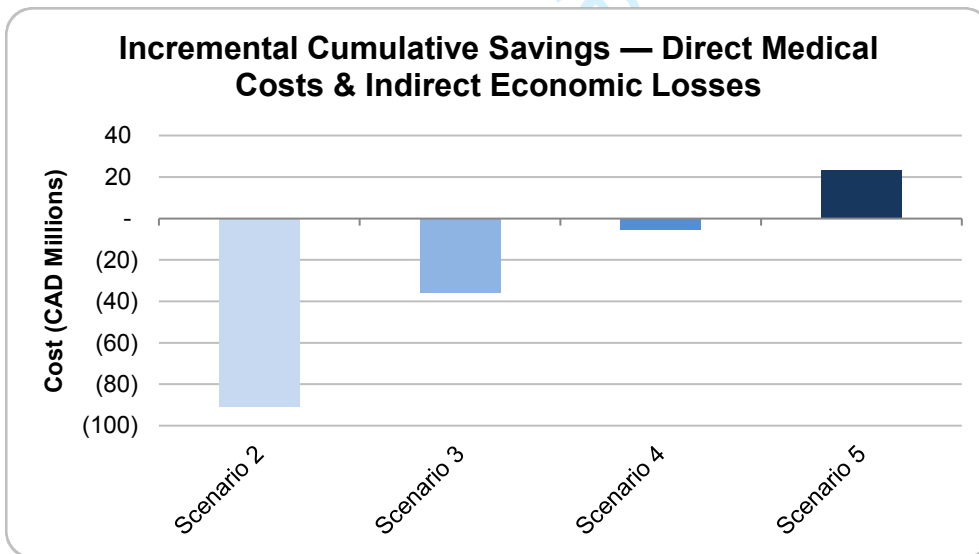

Figure 2. HBV-related direct A) HBV management and economic loss due to disease, and B) incremental cumulative savings as of 2050 as compared to adolescent.

Figure 3A

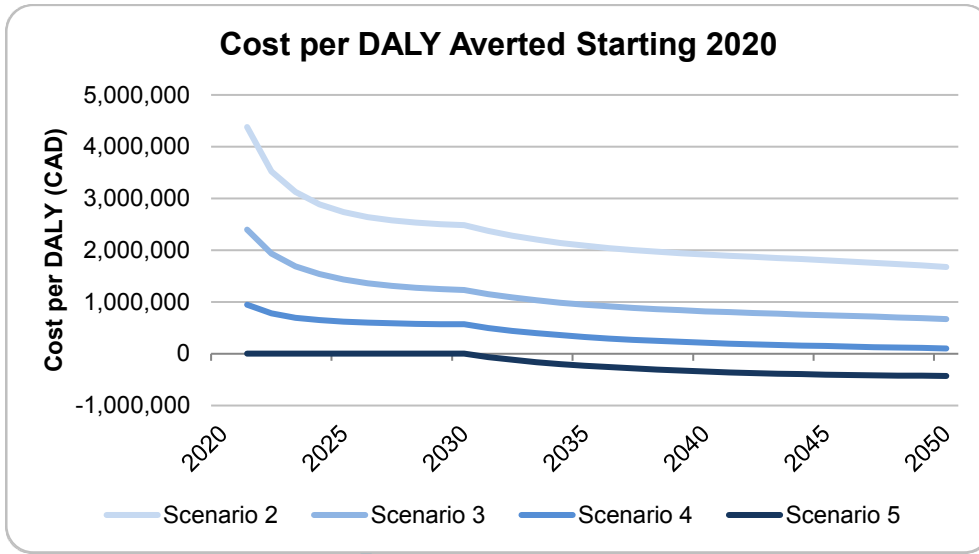

Figure 3B

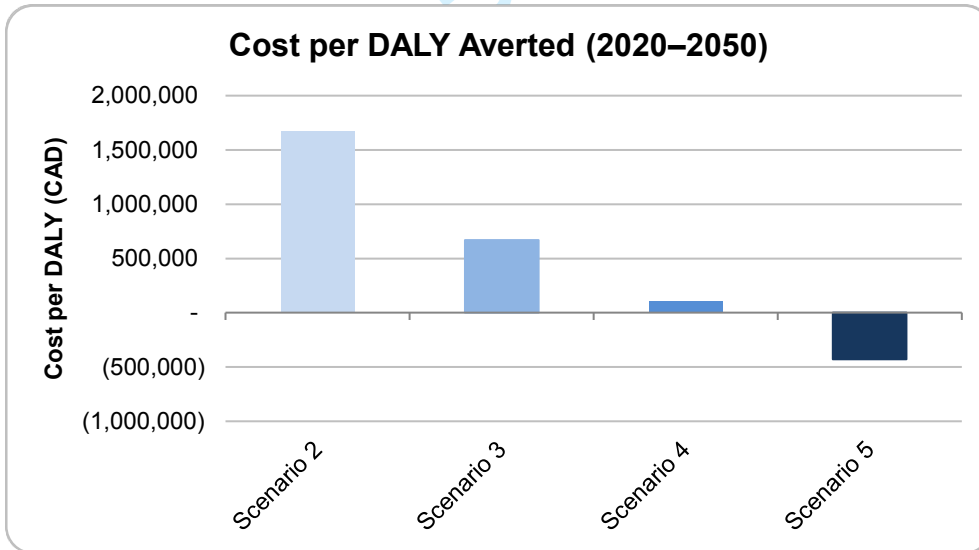

Figure 3. Cost per daily averted from A) 2020-2050 and B) as of 2050.

Figure 4

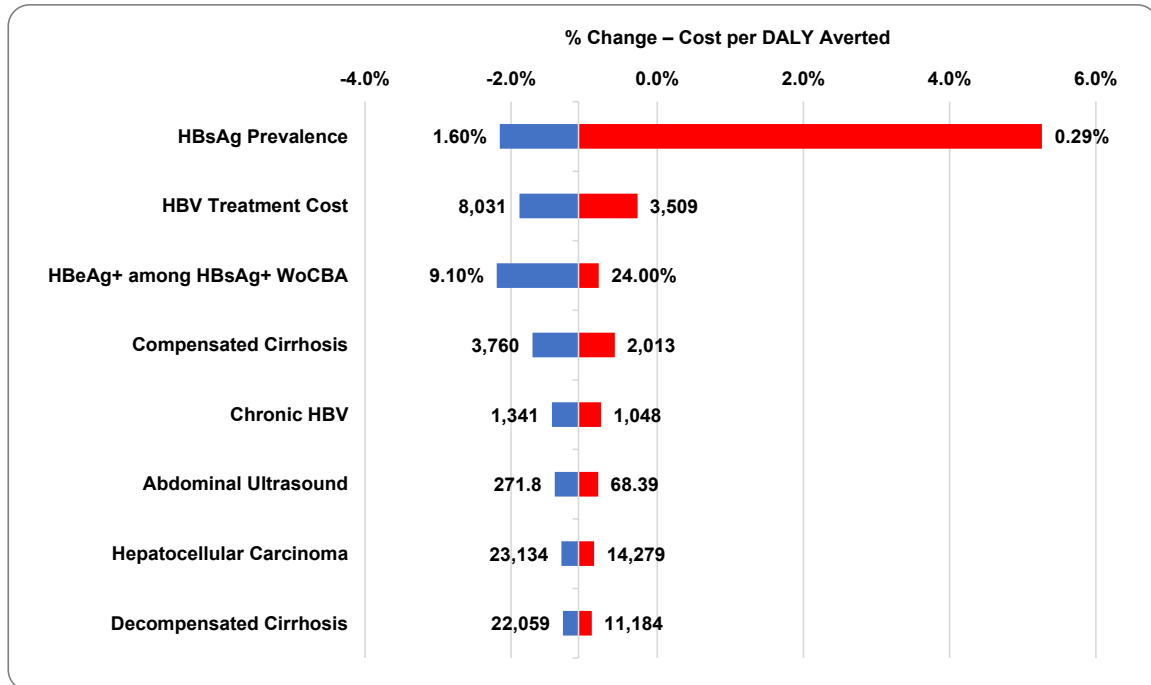

**Figure 4.** Key Drivers of Uncertainty – Cost per DALY Averted comparing vaccines at 2, 4, 6 months as a part of the hexavalent approach to adolescent vaccination.
